# Supplementary material
Source: PubMed Central journal article supplement (PMC1820662)

A

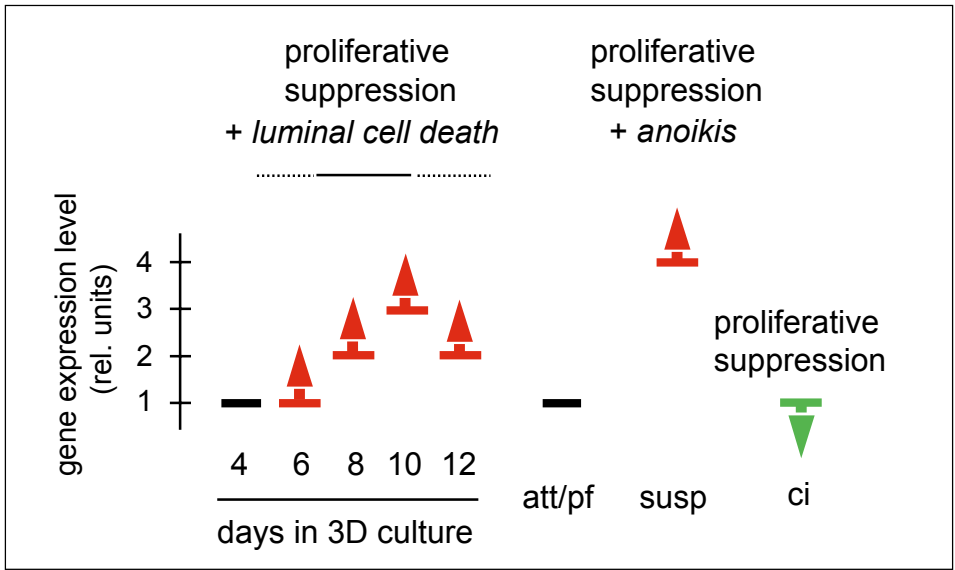

B

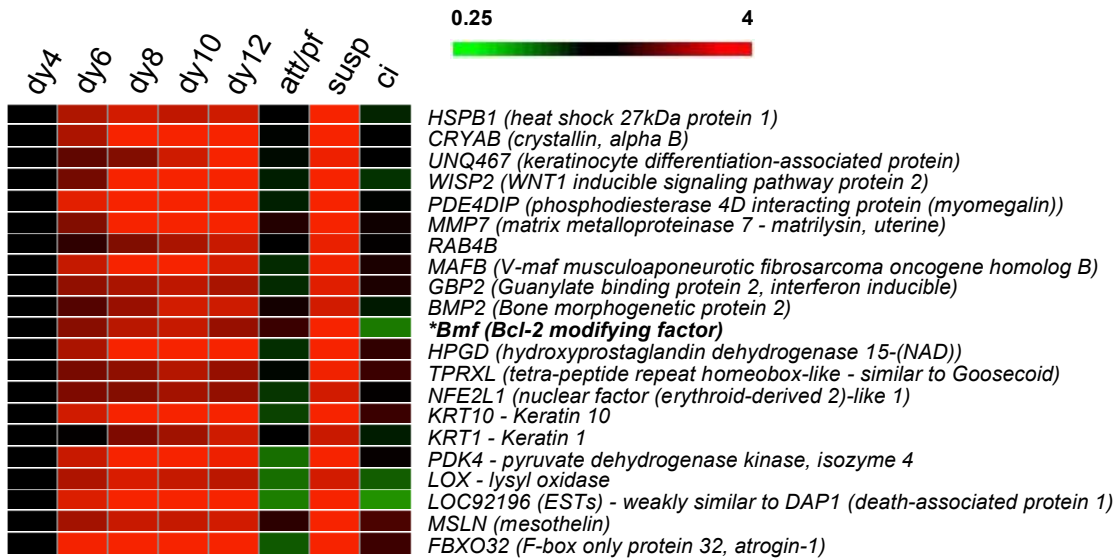

C

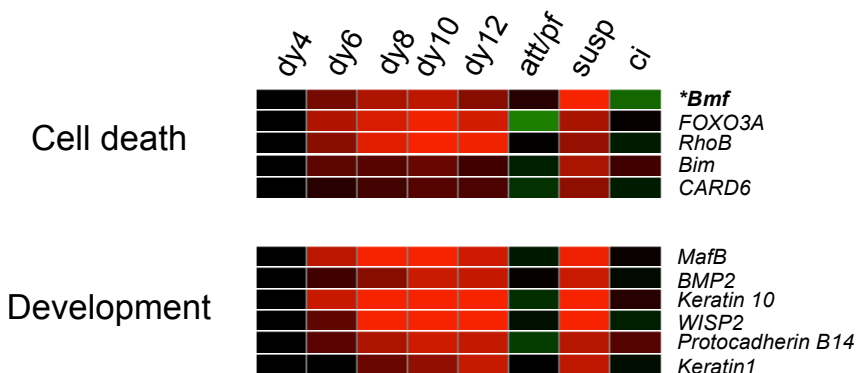

Supplement: pnas_0700115104_1.pdf [file pnas_0700115104_1.pdf]

**A**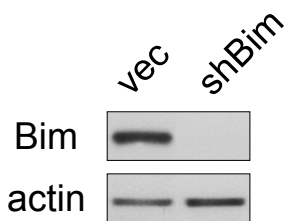**B**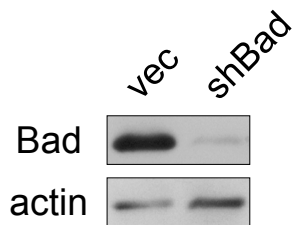**C**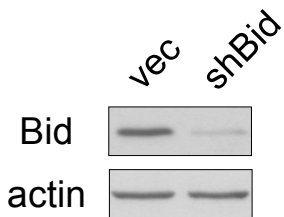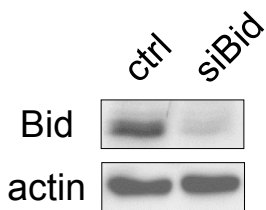**D**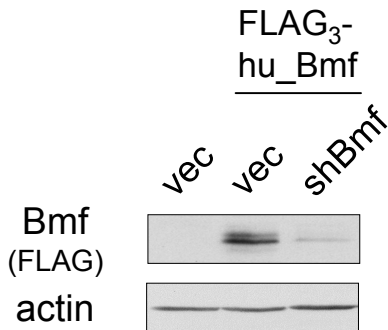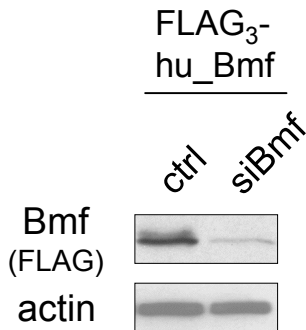

Supplement: pnas_0700115104_2.pdf [file pnas_0700115104_2.pdf]

A

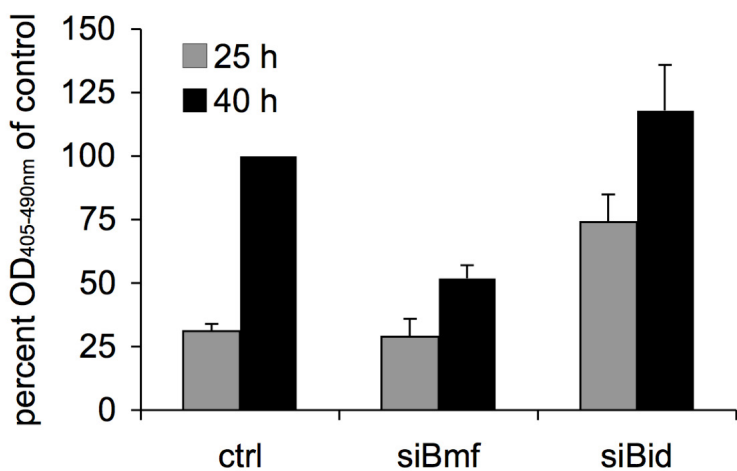

B

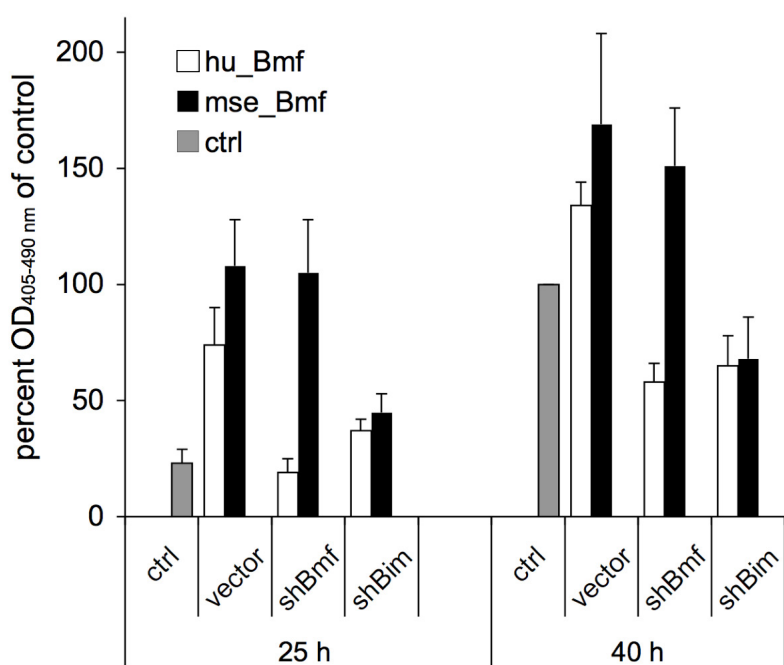

hu\_Bmf  
mse\_Bmf

TGCTGGCTATCGGCTTCCT  
CGCTGGCTA**C**AGGCTTCCT

FLAG<sub>3</sub>-mse\_Bmf

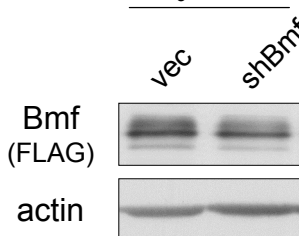

Supplement: pnas_0700115104_3.pdf [file pnas_0700115104_3.pdf]

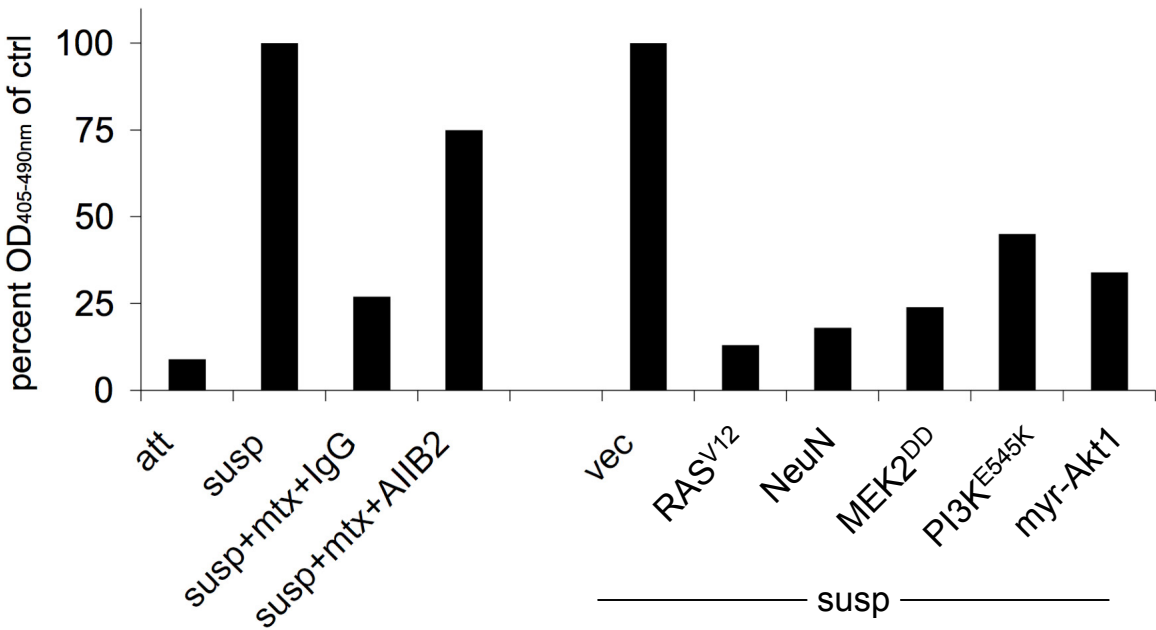

Supplement: pnas_0700115104_4.pdf [file pnas_0700115104_4.pdf]
